# Supplementary material for: Cumulative live birth rates for women returning to ART treatment for a second ART-conceived child
Source: Oxford University Press journal article supplement (doi:10.1093/humrep/deaa030), 2020-03-17
Supplement: suppl_fig1_deaa030.pdf [file suppl_fig1_deaa030.pdf]

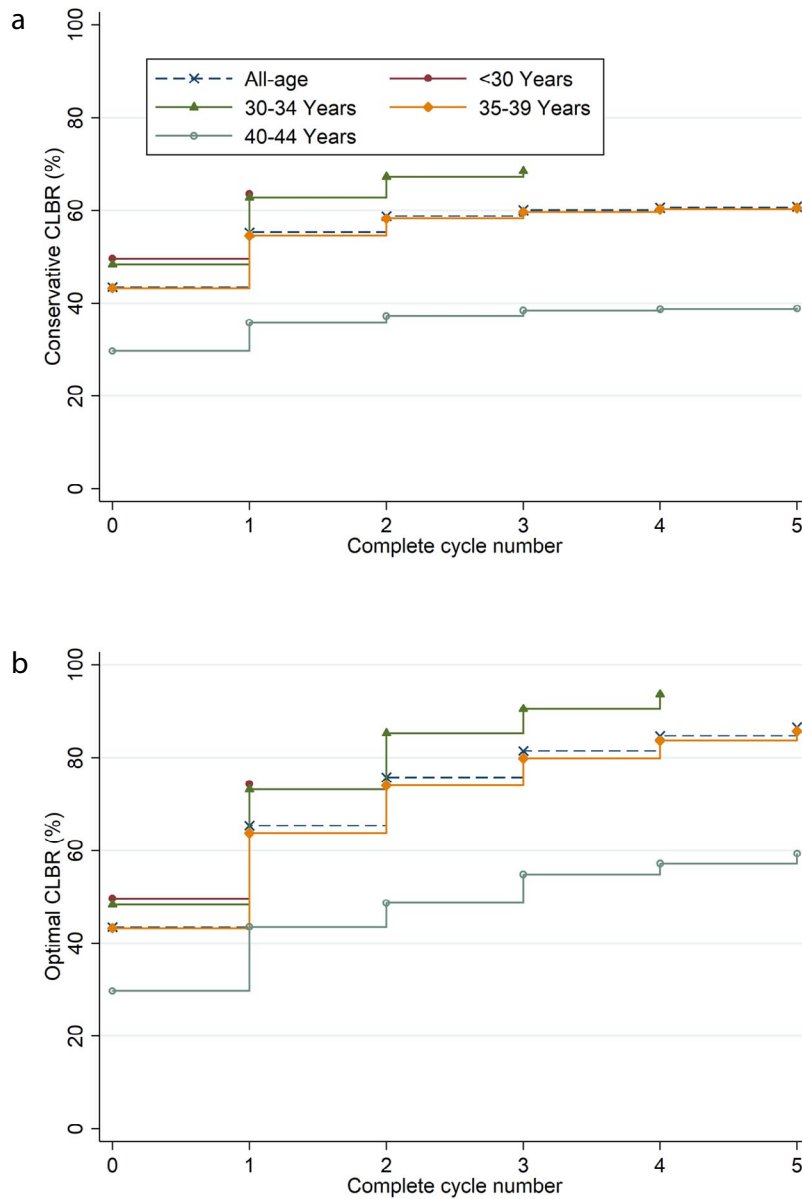

**Supplementary Figure S1** Cumulative live birth rates for women\* who initiated ART treatment for the second ART-conceived live birth with the frozen embryos created in the cycle that resulted the first ART-conceived live birth (total women: 11 196).

(a) Conservative cumulative live birth rate (CLBR). (b) Optimal CLBR. \*Women who conceived their first live birth following ART treatment performed in 2009–2013 and followed up for ART treatments performed to December 2015. Note: complete cycle number '0' represents the cycle that initiated with the frozen embryos created in the cycle that resulted in the first ART-conceived live birth. Note: CLBR was calculated for a complete cycle only when at least 50 women had commenced the cycle.
