# Supplementary material for: Cumulative live birth rates for women returning to ART treatment for a second ART-conceived child
Source: Oxford University Press journal article supplement (doi:10.1093/humrep/deaa030), 2020-03-17
Supplement: suppl_fig2_deaa030.pdf [file suppl_fig2_deaa030.pdf]

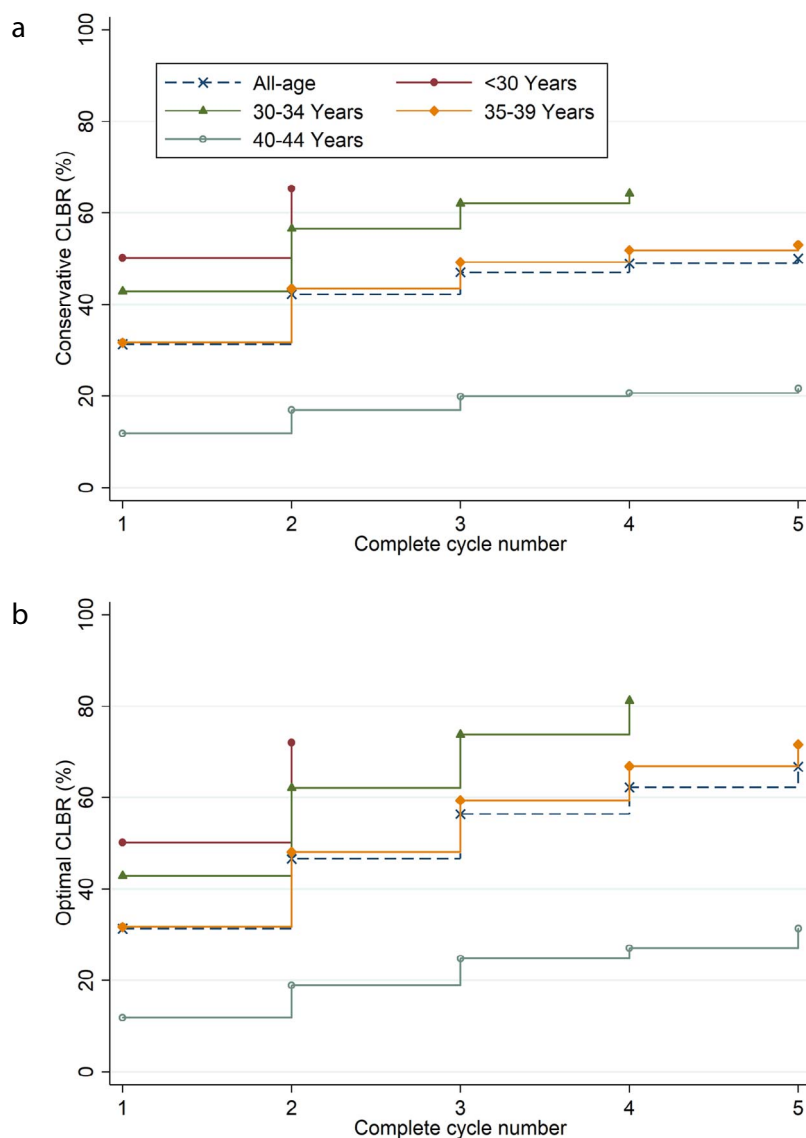

**Supplementary Figure S2 CLBR for women\* who initiated ART treatment for the second ART-conceived live birth with a new ovarian stimulation cycle (total women: 4128). (a) Conservative CLBR. (b) Optimal CLBR. \*Women who conceived their first live birth following ART treatment performed in 2009–2013 and followed up for ART treatments performed to December 2015. Note: CLBR was calculated for a complete cycle only when at least 50 women had commenced the cycle**
