# Supplementary material for: Cumulative live birth rates for women returning to ART treatment for a second ART-conceived child
Source: Oxford University Press journal article supplement (doi:10.1093/humrep/deaa030), 2020-03-17
Supplement: suppl_tab1_deaa030.pdf [file suppl_tab1_deaa030.pdf]

**Supplementary Table S1 Demographic and treatment characteristics of women who recommenced ART treatment for a second ART-conceived baby, Australia and New Zealand.<sup>†</sup>**

| Characteristics                                                                                                                                   | Number of women | %    |
|---------------------------------------------------------------------------------------------------------------------------------------------------|-----------------|------|
| Total number of women initiating ART treatment for a second ART-conceived live birth                                                              | 15 325          |      |
| Number of women achieving a second ART-conceived live birth                                                                                       | 8946            | 58.4 |
| Female age in years at initial attempt for second ART-conceived live birth; <i>median (IQR)</i>                                                   | 36 (32–38)      |      |
| <30                                                                                                                                               | 1354            | 8.8  |
| 30–34                                                                                                                                             | 4952            | 32.3 |
| 35–39                                                                                                                                             | 6343            | 41.4 |
| 40–44                                                                                                                                             | 2580            | 16.8 |
| >44                                                                                                                                               | 96              | 0.6  |
| Cause of infertility as diagnosed at initial attempt for second ART-conceived live birth                                                          |                 |      |
| Male-only                                                                                                                                         | 2737            | 17.9 |
| Female factor                                                                                                                                     |                 |      |
| Tubal disease only                                                                                                                                | 637             | 4.2  |
| Endometriosis only                                                                                                                                | 917             | 6    |
| Combined tubal and endometriosis                                                                                                                  | 666             | 4.3  |
| Other female factor only                                                                                                                          | 2057            | 13.4 |
| Combined male–female factors                                                                                                                      | 3187            | 20.8 |
| Unexplained                                                                                                                                       | 3285            | 21.4 |
| Not stated                                                                                                                                        | 1838            | 12   |
| Period of time (in years) between the first ART-conceived live birth and initial attempt for second ART-conceived live birth                      |                 |      |
| <1 year                                                                                                                                           | 3663            | 23.9 |
| ≥1 and <2 years                                                                                                                                   | 8523            | 55.6 |
| ≥2 and <3 years                                                                                                                                   | 2323            | 15.2 |
| ≥3 years                                                                                                                                          | 816             | 5.3  |
| Initiated for the second ART-conceived live birth with frozen embryo/s collected in the cycle that resulted in the first ART-conceived live birth |                 |      |
| Yes                                                                                                                                               | 11 196          | 73.1 |
| No                                                                                                                                                | 4129            | 26.9 |
| Total number of initiated single cycles <sup>‡</sup> (average number per woman)                                                                   | 38 102 (2.6)    |      |
| Total number of embryo transfer cycles (average number per woman)                                                                                 | 32 871 (2.1)    |      |
| <b>Fresh cycles</b>                                                                                                                               |                 |      |
| Total number of embryo transfer cycles (average number per woman)                                                                                 | 10 832 (0.7)    |      |
| Live births from fresh embryo transfer cycles (% of events)                                                                                       | 2808            | 25.9 |
| Number of fresh embryos transferred per embryo transfer event                                                                                     |                 |      |
| 1 embryo (% of fresh embryo events)                                                                                                               | 8026            | 74.1 |
| ≥2 embryos (% of fresh embryo events)                                                                                                             | 2806            | 25.9 |
| <b>Frozen/thaw cycles</b>                                                                                                                         |                 |      |
| Total number of thaw embryo transfer cycles (average number per woman)                                                                            | 22 039 (1.4)    |      |
| Live births from frozen/thaw embryo transfer cycles (% of events)                                                                                 | 6138            | 27.8 |
| Number of frozen/thaw embryos transferred per embryo transfer event                                                                               |                 |      |
| 1 embryo (% of frozen/thaw embryo transfer events)                                                                                                | 20 281          | 92.0 |
| ≥2 embryos (% of frozen/thaw embryo transfer events)                                                                                              | 1758            | 8.0  |

<sup>†</sup>Women who conceived their first live birth following ART treatment performed in 2009–2013, and treatment followed up until 31 December 2015

<sup>‡</sup>Either an initiated ovarian stimulation cycle or an initiated frozen/thaw cycle.

IQR: interquartile range
