# Supplementary material for: Cumulative live birth rates for women returning to ART treatment for a second ART-conceived child
Source: Oxford University Press journal article supplement (doi:10.1093/humrep/deaa030), 2020-03-17
Supplement: suppl_tab2_deaa030.pdf [file suppl_tab2_deaa030.pdf]

**Supplementary Table SII** Cycle-specific and cumulative livebirth rates for women<sup>†</sup> who initiated ART treatment for a second ART-conceived livebirth with frozen embryo/s collected in the cycle that resulted the first ART-conceived livebirth (total women: 11,196).

| Complete cycle number <sup>¥</sup> | Number of women starting cycle | Number of livebirths | Livebirth rate (%)      |                                  |                                |
|------------------------------------|--------------------------------|----------------------|-------------------------|----------------------------------|--------------------------------|
|                                    |                                |                      | Cycle-specific (95% CI) | Cumulative Conservative (95% CI) | Cumulative Optimistic (95% CI) |
| <b>Age-group &lt;30 years</b>      |                                |                      |                         |                                  |                                |
| Remaining frozen*                  | 1,051                          | 522                  | 49.7 (45.6-54.1)        | 49.7 (46.6-52.7)                 | 49.7 (46.9-52.7)               |
| 1                                  | 298                            | 146                  | 49.0 (41.7-57.6)        | 63.6 (60.6-66.5)                 | 74.3 (71.0-77.5)               |
| <b>Age-group 30-34 years</b>       |                                |                      |                         |                                  |                                |
| Remaining frozen*                  | 3,849                          | 1,861                | 48.4 (46.2-50.6)        | 48.4 (46.8-49.9)                 | 48.4 (46.8-49.9)               |
| 1                                  | 1,158                          | 558                  | 48.2 (44.3-52.4)        | 62.8 (61.3-64.4)                 | 73.2 (71.5-74.9)               |
| 2                                  | 378                            | 170                  | 45.0 (38.7-52.2)        | 67.3 (65.6-68.7)                 | 85.3 (83.6-86.9)               |
| 3                                  | 138                            | 49                   | 35.5 (26.8-47.0)        | 68.5 (67.0-70.0)                 | 90.5 (88.9-92.0)               |
| 4                                  | 57                             | 19                   | 33.3 (21.3-52.3)        | 69.0 (67.5-70.5)                 | 93.7 (92.0-95.1)               |
| <b>Age-group 35-39 years</b>       |                                |                      |                         |                                  |                                |
| Remaining frozen*                  | 4,583                          | 1,982                | 43.2 (41.4-45.2)        | 43.2 (41.8-44.7)                 | 43.2 (41.8-44.7)               |
| 1                                  | 1,437                          | 518                  | 36.0 (33.1-39.3)        | 54.5 (53.1-56.0)                 | 63.7 (62.0-65.4)               |
| 2                                  | 594                            | 170                  | 28.6 (24.6-33.3)        | 58.3 (56.9-59.7)                 | 74.1 (72.3-75.9)               |
| 3                                  | 297                            | 66                   | 22.2 (17.5-28.3)        | 59.7 (58.3-61.1)                 | 79.8 (78.0-81.7)               |
| 4                                  | 147                            | 28                   | 19.0 (13.2-27.6)        | 60.3 (58.9-61.7)                 | 83.7 (81.7-85.6)               |
| 5                                  | 95                             | 12                   | 12.6 (7.2-22.2)         | 60.6 (59.1-62.0)                 | 85.7 (83.6-87.7)               |
| <b>Age-group 35-39 years</b>       |                                |                      |                         |                                  |                                |
| Remaining frozen*                  | 1,661                          | 493                  | 29.7 (27.2-32.4)        | 29.7 (27.5-31.9)                 | 29.7 (27.6-31.9)               |
| 1                                  | 518                            | 102                  | 19.7 (16.2-23.9)        | 35.8 (33.5-38.2)                 | 43.5 (40.6-46.6)               |
| 2                                  | 262                            | 24                   | 9.2 (6.1-13.7)          | 37.3 (34.9-39.6)                 | 48.7 (45.4-52.1)               |
| 3                                  | 160                            | 19                   | 11.9 (7.6-18.6)         | 38.4 (36.1-40.8)                 | 54.8 (50.9-58.6)               |
| 4                                  | 95                             | 5                    | 5.3 (2.2-12.6)          | 38.7 (36.4-41.1)                 | 57.2 (53.0-61.4)               |
| 5                                  | 59                             | 3                    | 5.1 (1.6-15.8)          | 38.9 (36.5-41.3)                 | 59.3 (54.7-64.1)               |

<sup>†</sup> Women who conceived their first livebirth following ART treatment performed in 2009-2013, Australia and New Zealand, and treatment followed up until 31 December 2015.

\*Cycle that initiated with the frozen embryos collected in the cycle that resulted the first ART-conceived livebirth.

¥A complete cycle is defined as all embryo transfer events associated with an ovarian stimulation.

Note: Cumulative livebirth rates were only calculated when at least 50 women had commenced an ovarian stimulation cycle for particular cycle count.
