# Supplementary material for: Cumulative live birth rates for women returning to ART treatment for a second ART-conceived child
Source: Oxford University Press journal article supplement (doi:10.1093/humrep/deaa030), 2020-03-17
Supplement: suppl_tab3_deaa030.pdf [file suppl_tab3_deaa030.pdf]

**Supplementary Table SIII** Cycle-specific and cumulative livebirth rates for women<sup>†</sup> who initiated for the second ART-conceived livebirth with a new ovarian stimulation cycle (total women: 4,128).

| Complete cycle number <sup>¥</sup> | Number of women starting cycle | Number of livebirths | Live delivery rate (%)  |                                  |                     |
|------------------------------------|--------------------------------|----------------------|-------------------------|----------------------------------|---------------------|
|                                    |                                |                      | Cycle-specific (95% CI) | Cumulative Conservative (95% CI) | Optimistic (95% CI) |
| <b>Age-group &lt;30 years</b>      |                                |                      |                         |                                  |                     |
| 1                                  | 303                            | 152                  | 50.2 (42.8-58.8)        | 50.2 (44.4-55.9)                 | 50.2 (44.7-55.9)    |
| 2                                  | 105                            | 46                   | 43.8 (32.8-58.5)        | 65.3 (59.7-70.7)                 | 72.0 (66.2-77.5)    |
| <b>Age-group 30-34 years</b>       |                                |                      |                         |                                  |                     |
| 1                                  | 1,103                          | 473                  | 42.9 (39.2-46.9)        | 42.9 (39.9-45.9)                 | 42.9 (40.0-45.9)    |
| 2                                  | 448                            | 151                  | 33.7 (28.7-39.5)        | 56.6 (53.6-59.5)                 | 62.1 (59.0-65.3)    |
| 3                                  | 198                            | 61                   | 30.8 (34.0-39.6)        | 62.1 (59.2-65.0)                 | 73.8 (70.5-77.0)    |
| 4                                  | 85                             | 24                   | 28.2 (18.9-42.1)        | 64.3 (61.4-67.1)                 | 81.2 (77.6-84.5)    |
| <b>Age-group 35-39 years</b>       |                                |                      |                         |                                  |                     |
| 1                                  | 1,759                          | 558                  | 31.7 (29.2-34.5)        | 31.7 (29.6-34.0)                 | 31.7 (29.6-34.0)    |
| 2                                  | 861                            | 206                  | 23.9 (20.9-27.4)        | 43.4 (41.1-45.8)                 | 48.1 (45.5-50.6)    |
| 3                                  | 469                            | 102                  | 21.7 (17.9-26.4)        | 49.2 (46.9-51.6)                 | 59.4 (56.6-62.2)    |
| 4                                  | 249                            | 46                   | 18.5 (13.8-24.7)        | 51.8 (49.5-54.2)                 | 66.9 (63.9-69.9)    |
| 5                                  | 140                            | 20                   | 14.3 (9.2-22.1)         | 53.0 (50.6-55.3)                 | 71.6 (68.4-74.8)    |
| <b>Age-group 40-44 years</b>       |                                |                      |                         |                                  |                     |
| 1                                  | 919                            | 109                  | 11.9 (9.4-14.3)         | 11.9 (9.8-14.1)                  | 11.9 (9.9-14.1)     |
| 2                                  | 585                            | 47                   | 8.0 (6.0-10.7)          | 17.0 (14.6-19.6)                 | 18.9 (16.4-21.9)    |
| 3                                  | 373                            | 27                   | 7.2 (5.0-10.6)          | 19.9 (17.3-22.6)                 | 24.8 (21.7-28.3)    |
| 4                                  | 236                            | 7                    | 3.0 (1.4-0.6)           | 20.7 (18.1-23.4)                 | 27.0 (23.6-30.8)    |
| 5                                  | 152                            | 9                    | 5.9 (3.0-11.4)          | 21.7 (19.0-24.5)                 | 31.4 (27.2-35.9)    |

<sup>†</sup> Women who conceived their first livebirth following ART treatment performed in 2009-2013, Australia and New Zealand, followed up until 31 December 2015.

<sup>¥</sup> A complete cycle is defined as all embryo transfer events associated with an ovarian stimulation.

Note: Cumulative livebirth rates were only calculated when at least 50 women had commenced an ovarian stimulation cycle for particular cycle count.
